# Supplementary material for: Airborne particulate matter increases MUC5AC expression by downregulating Claudin-1 expression in human airway cells
Source: PubMed Central journal article supplement — BMB Rep. 2017 Oct 31;50(10):516–21. doi: 10.5483/BMBRep.2017.50.10.100 (PMC5683821; doi:10.5483/bmbrep.2017.50.10.100), 2017-10-31
Supplement: BMB-50-516_suppl.pdf [file BMB-50-516_suppl.pdf]

## **Airborne particulate matter increases *MUC5AC* expression by downregulating Claudin-1 expression in human airway cells**

Sang-Su Kim<sup>1</sup>, Cheol Hong Kim<sup>2</sup>, Ji Wook Kim<sup>1</sup>, Hsi Chiang Kung<sup>1</sup>, Tae Woo Park<sup>1</sup>, Yu Som Shin<sup>1</sup>, Ju Deok Kim<sup>1</sup>, Siejeong Ryu<sup>1</sup>, Wang-Joon Kim<sup>3</sup>, Yung Hyun Choi<sup>5</sup>,  
and Kyoung Seob Song<sup>3, 4</sup>

<sup>1</sup>Department of Anesthesiology and Pain Medicine, Kosin University College of Medicine, Busan, Korea, <sup>2</sup>Department of Pediatrics, Sungkyunkwan University Samsung Changwon Hospital, Changwon, Korea, <sup>3</sup>Department of Physiology, Kosin University College of Medicine, Busan, Korea, <sup>4</sup>Institute of Medicine, Kosin University College of Medicine, Busan, Korea,

<sup>5</sup>Department of Biochemistry, College of Korean Medicine, Don-Eui University, Busan, Korea.

Corresponding Author

Kyoung Seob Song, PhD,

Department of Physiology,

Kosin University College of Medicine,

34 Amnam-dong, Seo-gu,

Busan 49267, Korea,

Tel: +82-51-990-6236,

Fax: +82-51-990-3081,

E-mail: [kssong@kosin.ac.kr](mailto:kssong@kosin.ac.kr),

Running title: The effect of Claudin-1 on PM-induced *MUC5AC* expression

## Supplementary Figure 1

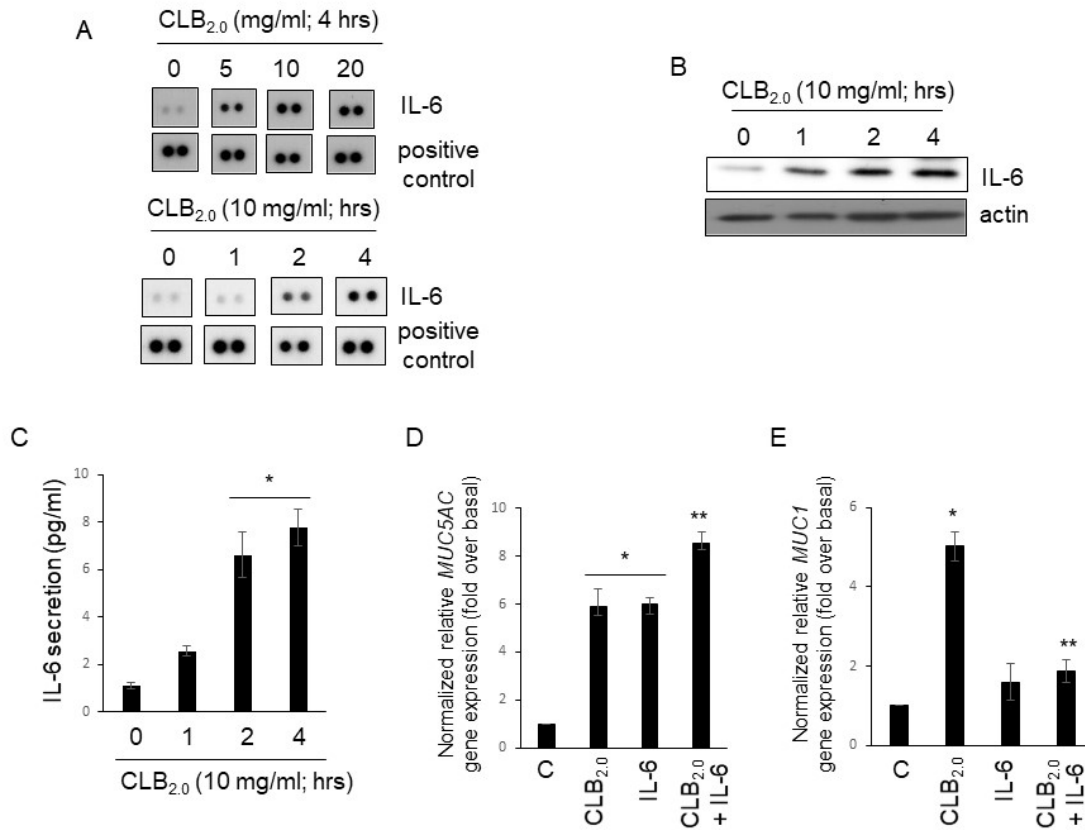

SFig. 1

### Fig. 1. CLB<sub>2.0</sub> induces IL-6 secretion and overexpression in NCI-H292 cells.

(A) The cells were treated with CLB<sub>2.0</sub> for 4 h and a cytokine assay was performed in a dose- and time-dependent manner. (B) After the treatment of CLB<sub>2.0</sub> for 4 h, the total cell lysates were analyzed by Western blot analysis with specific anti-IL-6 antibody. (C) The cells were then treated with CLB<sub>2.0</sub> for 4 h, and their supernatants were collected. The levels of IL-6 in the cell supernatants were measured by ELISA. \* $p < 0.05$  compared to the control. Values shown represent the means  $\pm$  SDs of three technical replicates from a single experiment. Cells were treated with CLB<sub>2.0</sub> (10 mg/mL), IL-6 (30 ng/mL) and both CLB<sub>2.0</sub> (10 mg/mL) and IL-6 (30 ng/mL) for 24 h, and their total RNA were collected, and then qRT-PCR for *MUC5AC* (D) and *MUC1* (E) transcript were performed. \* $p < 0.05$  compared to the control, \*\* $p < 0.05$  compared to CLB<sub>2.0</sub> only.
